# Supplementary material
Source: MDPI journal article supplement (https://www.mdpi.com/2311-5637/8/8/416)
Supplement: s1 [file s1]

**Table S1.** Results of statistical analysis using ANOVA variance analysis, represents the p-value of the samples in case of residual sugar content, volatile acid concentration and pH

| Sample    | Residual sugar | Volatile acid | pH      |
|-----------|----------------|---------------|---------|
|           | p-value        | p-value       | p-value |
| H1-H2     | 0.004 **       | 0.985         | 0.995   |
| Spas-H2   | 0.788          | 0.002 *       | 0.167   |
| ST-H2     | 0.002 **       | 0.847         | 0.999   |
| Spar-H2   | 0.786          | 0.002 *       | 0.318   |
| Skud-H2   | 0.0008 ****    | 0.255         | 0.218   |
| Spas-H1   | 0.011          | 0.005 *       | 0.337   |
| ST-H1     | 0.996          | 0.994         | 0.977   |
| Spar-H1   | 0.012          | 0.006         | 0.566   |
| Skud-H1   | 0.334          | 0.555         | 0.421   |
| ST-Spas   | 0.008 **       | 0.011         | 0.118   |
| Spar-Spas | 1.000          | 0.991         | 0.997   |
| Skud-Spas | 0.001 ***      | 0.064         | 0.999   |
| Spar-ST   | 0.008 **       | 0.014         | 0.233   |
| Skud-ST   | 0.524          | 0.834         | 0.156   |
| Skud-Spar | 0.001 ***      | 0.094         | 0.999   |

H1, H2: isolates investigated, Sc: *S. cerevisiae* CBS1171, Skud: *S. kudriavzevii* CBS 8840, Spar: *S. paradoxus* CBS 432, Spas: *S. pastorianus* VTT-A63015  
, ST: *S. cerevisiae* Fermol Elegance starter strain,  $p \leq 0$  \*\*\*\*,  $p \leq 0.001$  \*\*\*,  $p \leq 0.01$  \*\*,  $p \leq 0.05$  \*

**Table S2.** Significant components identified by One-way ANOVA and post-hoc analysis

|                            | <b>f values</b> | <b>p values</b> | <b>Fisher's LSD Post-hoc test</b>                                                                                                                                   |
|----------------------------|-----------------|-----------------|---------------------------------------------------------------------------------------------------------------------------------------------------------------------|
| <b>acetic acid</b>         | 141.17          | 3.13E-10        | H2 - H1; H1 - Skud; H1 - Spar; H1 - Spas; H2 - Skud; H2 - Spar; H2 - Spas; H2 - ST; Skud - Spar; Skud - Spas; ST - Spar; ST - Spas                                  |
| <b>glycerol</b>            | 129.99          | 5.08E-10        | H2 - H1; Skud - H1; Spar - H1; Spas - H1; ST - H1; Skud - H2; Spar - H2; H2 - Spas; ST - H2; Skud - Spar; Skud - Spas; Skud - ST; Spar - Spas; Spar - ST; ST - Spas |
| <b>ethyl-butyrate</b>      | 50.372          | 1.22E-07        | H2 - H1; Spar - H1; Spas - H1; ST - H1; H2 - Skud; Spar - H2; H2 - Spas; H2 - ST; Spar - Skud; Spas - Skud; ST - Skud; Spar - Spas; Spar - ST                       |
| <b>butanol</b>             | 41.457          | 3.66E-07        | Spar - H1; Spas - H1; Spar - H2; Spas - H2; Spar - Skud; Spas - Skud; Spar - Spas; Spar - ST; Spas - ST                                                             |
| <b>ethyl-hexanoate</b>     | 33.936          | 1.12E-06        | H2 - H1; Spar - H1; Spas - H1; ST - H1; H2 - Skud; H2 - Spas; H2 - ST; Spar - Skud; Spas - Skud; ST - Skud; Spar - Spas; Spar - ST                                  |
| <b>isobutanol</b>          | 33.591          | 1.18E-06        | H2 - H1; Skud - H1; Skud - H2; Skud - Spar; Skud - Spas; Skud - ST                                                                                                  |
| <b>isopentyl acetate</b>   | 27.194          | 3.74E-06        | H2 - H1; Spar - H1; Spas - H1; H2 - Skud; H2 - ST; Spar - Skud; Spas - Skud; Spar - ST; Spas - ST                                                                   |
| <b>isopentyl alcohol</b>   | 20.67           | 1.62E-05        | H2 - H1; Skud - H1; Spar - H1; Spas - H1; Spar - H2; H2 - ST; Spar - Skud; Skud - ST; Spar - Spas; Spar - ST; Spas - ST                                             |
| <b>isobutyl-acetate</b>    | 19.725          | 2.06E-05        | H2 - H1; Skud - H1; Spar - H1; ST - H1; Skud - H2; H2 - Spar; H2 - Spas; Skud - Spar; Skud - Spas; Skud - ST; ST - Spas                                             |
| <b>ethyl-lactate</b>       | 19.637          | 2.11E-05        | H2 - H1; Spar - H1; Spas - H1; H2 - Skud; H2 - ST; Spar - Skud; Spas - Skud; Spar - ST; Spas - ST                                                                   |
| <b>2-phenylethanol</b>     | 16.872          | 4.62E-05        | H2 - H1; Spar - H1; Spas - H1; Spar - H2; H2 - ST; Spar - Skud; Spar - Spas; Spar - ST; Spas - ST                                                                   |
| <b>ethyl-acetate</b>       | 14.422          | 1.02E-04        | H2 - H1; Spar - H1; ST - H1; H2 - Skud; H2 - Spar; H2 - Spas; H2 - ST; Spar - Skud; ST - Skud; Spar - Spas; ST - Spas                                               |
| <b>2-phenethyl acetate</b> | 11.131          | 3.57E-04        | H2 - H1; Spar - H1; Spas - H1; H2 - Skud; H2 - ST; Spar - Skud; Spas - Skud; Spar - ST; Spas - ST                                                                   |
| <b>hexyl-acetate</b>       | 7.0173          | 2.78E-03        | H1 - Skud; H2 - Skud; Spar - Skud; Spas - Skud; ST - Skud; Spas - ST                                                                                                |
| <b>diethyl-succinate</b>   | 5.6893          | 6.45E-03        | Spar - H1; Spar - H2; Spar - Skud; Spar - Spas; Spar - ST                                                                                                           |

H1, H2: isolates investigated, Skud: *S. kudriavzevii* CBS 8840, Spar: *S. paradoxus* CBS 432, Spas: *S. pastorianus* VTT-A63015, ST: *S. cerevisiae* Fermol Elegance starter strain

**Table S3.** PC1 and PC2 loading values of the volatile components PCA.

| Compound Name       | Loadings  |            |
|---------------------|-----------|------------|
|                     | PC1       | PC2        |
| glycerol            | 0.99996   | -0.0010939 |
| isobutanol          | 0.0065121 | -0.038795  |
| isopentyl alcohol   | 0.0052171 | 0.20383    |
| 2-phenylethanol     | 9.86E-04  | 0.091742   |
| ethyl-acetate       | 3.85E-04  | -0.048921  |
| acetic acid         | -2.16E-04 | -0.97242   |
| butanol             | 6.78E-05  | 0.022328   |
| 1-hexanol           | -3.20E-05 | 2.58E-04   |
| isopentyl acetate   | -2.56E-05 | 0.0030368  |
| ethyl-lactate       | 2.43E-05  | 0.0044502  |
| ethyl-butyrate      | 1.26E-05  | 6.74E-04   |
| hexyl-acetate       | -9.59E-06 | 1.49E-04   |
| isobutyl-acetate    | 8.33E-06  | -1.22E-04  |
| ethyl-hexanoate     | 6.96E-06  | 4.41E-04   |
| 2-phenethyl acetate | -5.19E-06 | 8.31E-04   |
| diethyl-succinate   | 1.03E-06  | 2.57E-04   |
| beta-citronellol    | 7.08E-07  | -1.67E-05  |
| linalool            | 5.58E-07  | -1.06E-05  |

**Figure S1.** Results of the physiological characterization I: glucose tolerance test in presence 30% glucose, ethanol tolerance using 30% ethanol, killer activity test, glucose fermentation test at 16 °C, temperature tolerance test at 5 °C, 16 °C, 24 °C and 37 °C

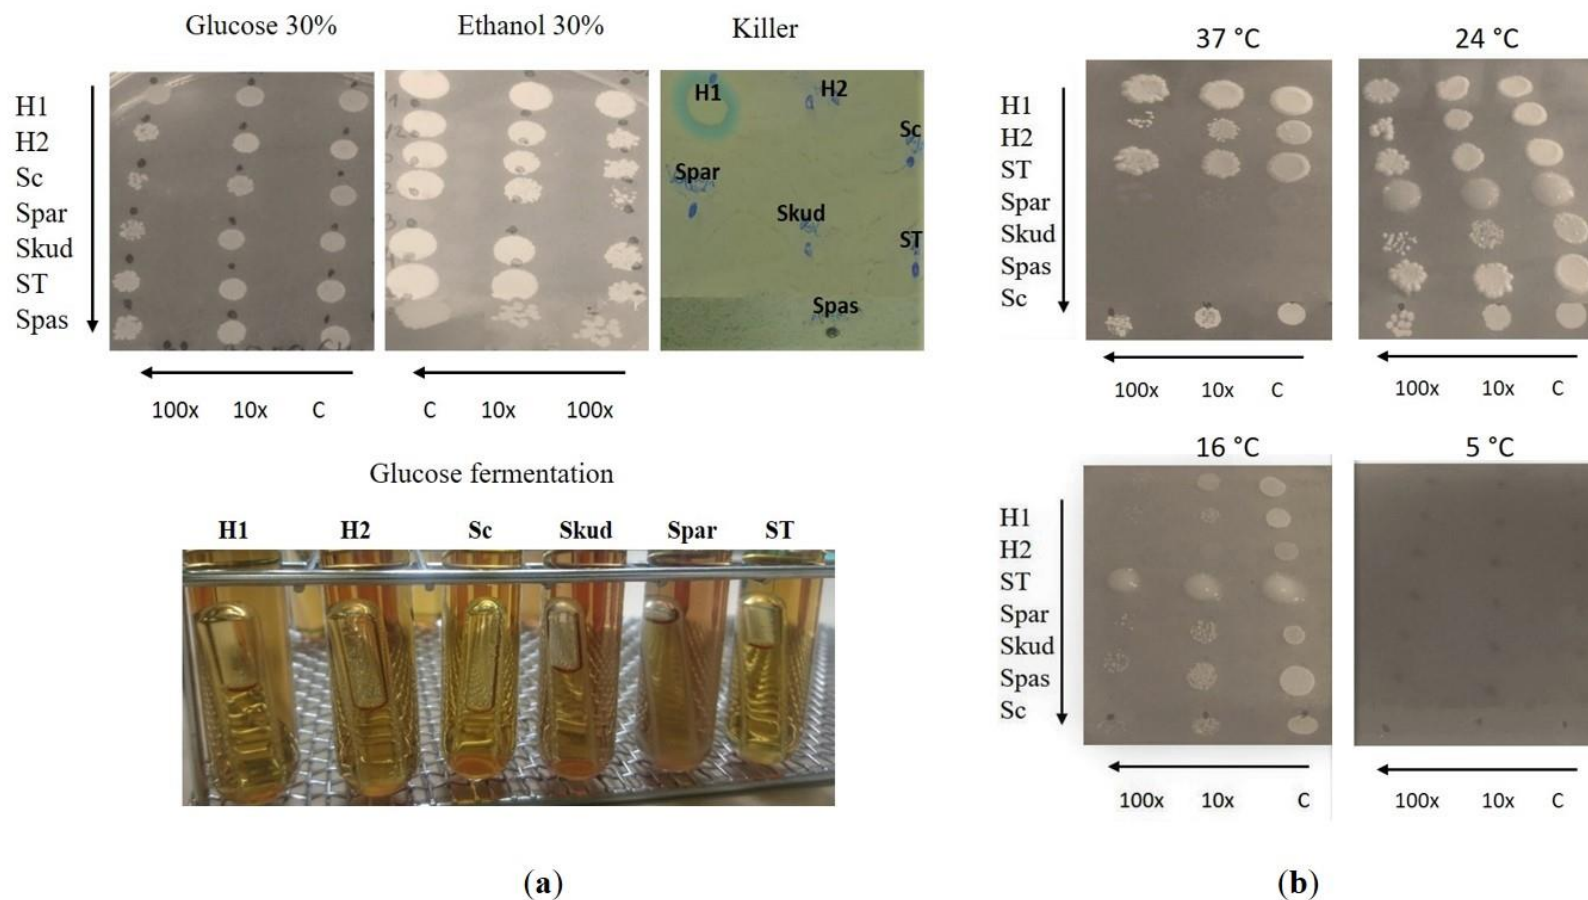

H1, H2: isolates investigated, Sc: *S. cerevisiae* CBS1171, Skud: *S. kudriavzevii* CBS 8840, Spar: *S. paradoxus* CBS 432, Spas: *S. pastorianus* VTT-A63015, ST: *S. cerevisiae* Fermol Elegance starter strain, strains were tested using glucose tolerance test (30%), ethanol tolerance test (30%), killer activity test, glucose fermentation test at 16 °C (a) and temperature tolerance test at 5 °C, 16 °C, 24 °C, 37 °C (b), C: non-diluted cell suspension, 10x: 10 times diluted cell suspension, 100x: 100 times diluted cell suspension. Glucose tolerance of *S. pastorianus* reference strain was not determined and glucose fermentation result of *S. pastorianus* is not presented.

**Figure S2.** Results of the physiological characterization II: sulphur dioxide (SO<sub>2</sub>) tolerance determined by microdilution methods

| 30°C, 48h | 0 | 20 | 40 | 60 | 80 | 100 | 120 | 140 | 160 | 180 | 200 | 220 | 240 | 260 | 280 | 300 |
|-----------|---|----|----|----|----|-----|-----|-----|-----|-----|-----|-----|-----|-----|-----|-----|
| H2        | + | +  | +  | +  | +  | +   | +   | +   | +   | +   | -   | -   | -   | -   | -   | -   |
| H1        | + | +  | +  | +  | +  | +   | +   | +   | +   | +   | +   | +   | -   | -   | -   | -   |
| ST        | + | +  | +  | +  | +  | +   | +   | +   | +   | +   | +   | +   | -   | -   | -   | -   |
| Sc        | + | +  | +  | -  | -  | -   | -   | -   | -   | -   | -   | -   | -   | -   | -   | -   |
| Spa       | + | +  | +  | +  | +  | +   | +   | +   | -   | -   | -   | -   | -   | -   | -   | -   |
| Skud      | + | +  | -  | -  | -  | -   | -   | -   | -   | -   | -   | -   | -   | -   | -   | -   |
| Spas      | + | +  | +  | -  | -  | -   | -   | -   | -   | -   | -   | -   | -   | -   | -   | -   |

| 30°C, 72h | 0 | 20 | 40 | 60 | 80 | 100 | 120 | 140 | 160 | 180 | 200 | 220 | 240 | 260 | 280 | 300 |
|-----------|---|----|----|----|----|-----|-----|-----|-----|-----|-----|-----|-----|-----|-----|-----|
| H2        | + | +  | +  | +  | +  | +   | +   | +   | +   | +   | -   | -   | -   | -   | -   | -   |
| H1        | + | +  | +  | +  | +  | +   | +   | +   | +   | +   | +   | +   | -   | -   | -   | -   |
| ST        | + | +  | +  | +  | +  | +   | +   | +   | +   | +   | +   | +   | +   | -   | -   | -   |
| Sc        | + | +  | +  | +  | -  | -   | -   | -   | -   | -   | -   | -   | -   | -   | -   | -   |
| Spa       | + | +  | +  | +  | +  | +   | +   | +   | -   | -   | -   | -   | -   | -   | -   | -   |
| Skud      | + | +  | +  | -  | -  | -   | -   | -   | -   | -   | -   | -   | -   | -   | -   | -   |
| Spas      | + | +  | +  | +  | -  | -   | -   | -   | -   | -   | -   | -   | -   | -   | -   | -   |

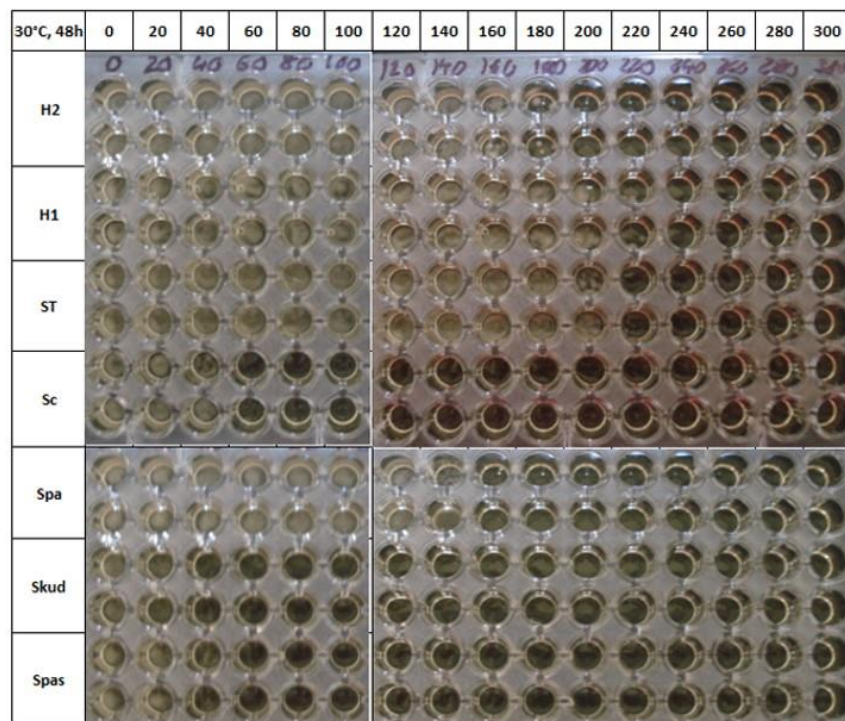

(a)

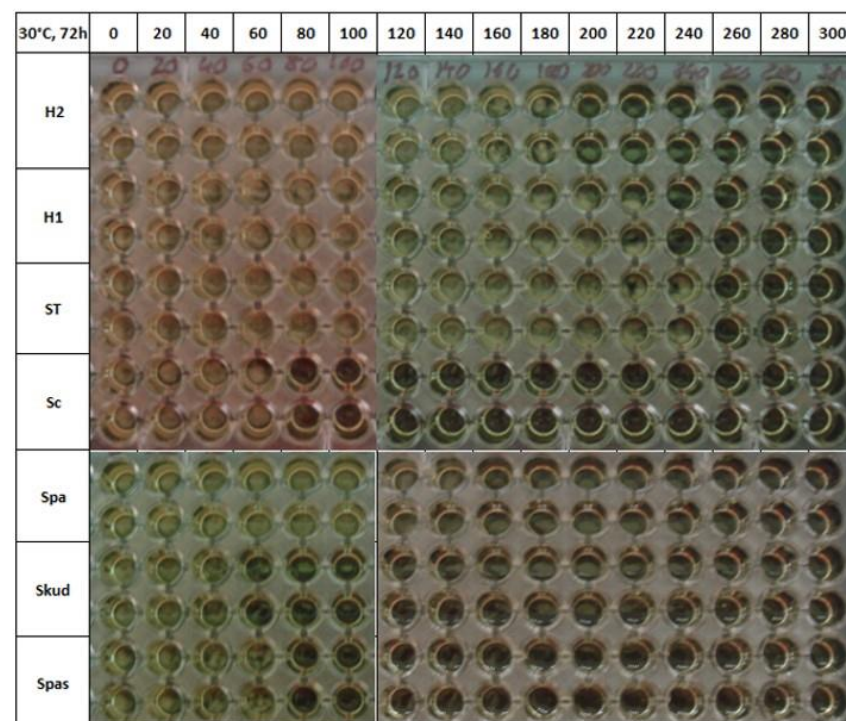

(b)

H1, H2: isolates investigated, Sc: *S. cerevisiae* CBS1171, Skud: *S. kudriavzevii* CBS 8840, Spar: *S. paradoxus* CBS 432, Spas: *S. pastorianus* VTT-A63015, ST: *S. cerevisiae* Fermol Elegance starter strain. The tested potassium metabisulphite concentrations were 0, 20, 40, 60, 80, 100, 120, 140, 160, 180, 200, 220, 240, 260, 280 and 300 mg/L. The strains were incubated for 48 (a) or 72 hours (b) at 30 °C. The presented figure shows two technical replicons of a MIC determination measurement.

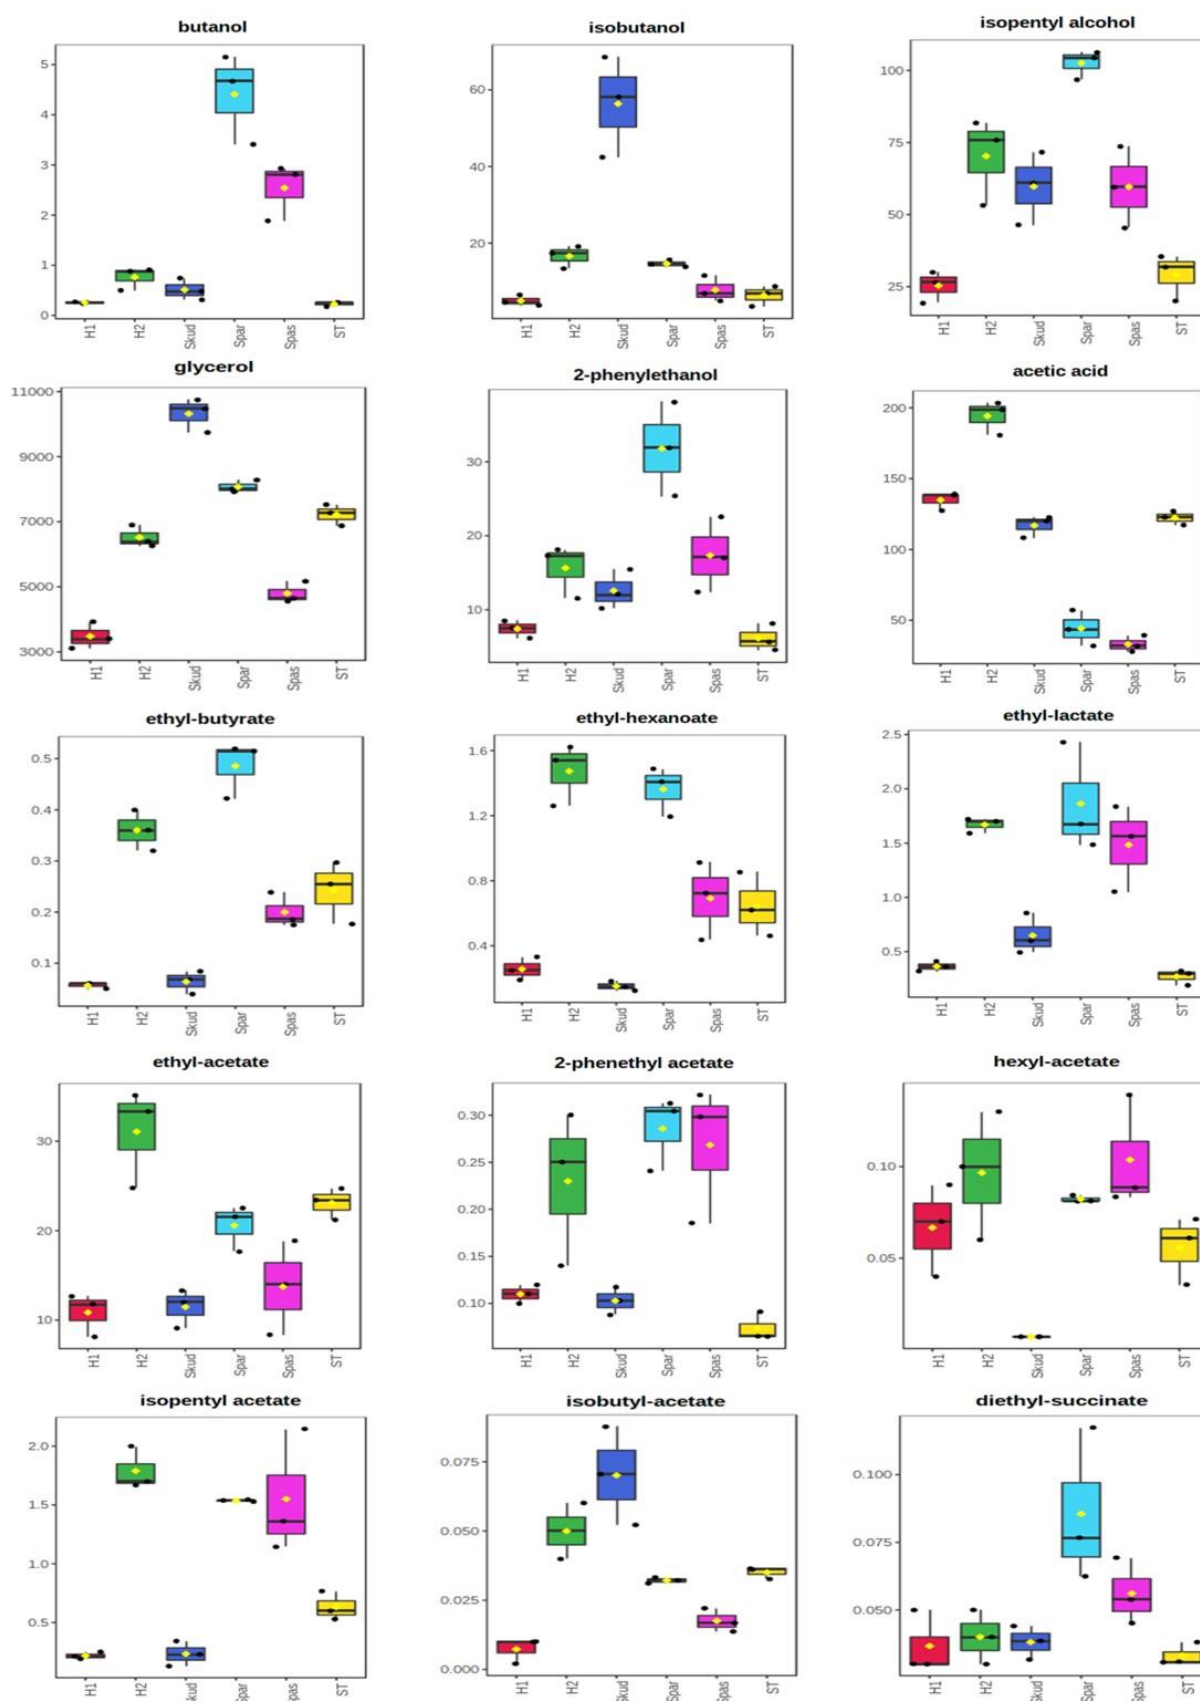

**Figure S3.** Differences in volatile compounds and glycerol in wines made with different starter yeasts. On the x-axis of the figure, the different yeast strains are shown in colours: H1 (red), H2 (green): isolates investigated, Skud: *S. kudriavzevii* CBS 8840 (blue), Spar: *S. paradoxus* CBS 432 (turquoise), Spas: *S. pastorianus* VTT-A63015, ST (purple): *S. cerevisiae* Fermol Elegance starter strain (yellow). Concentration values are plotted on the y-axis (mg/L).



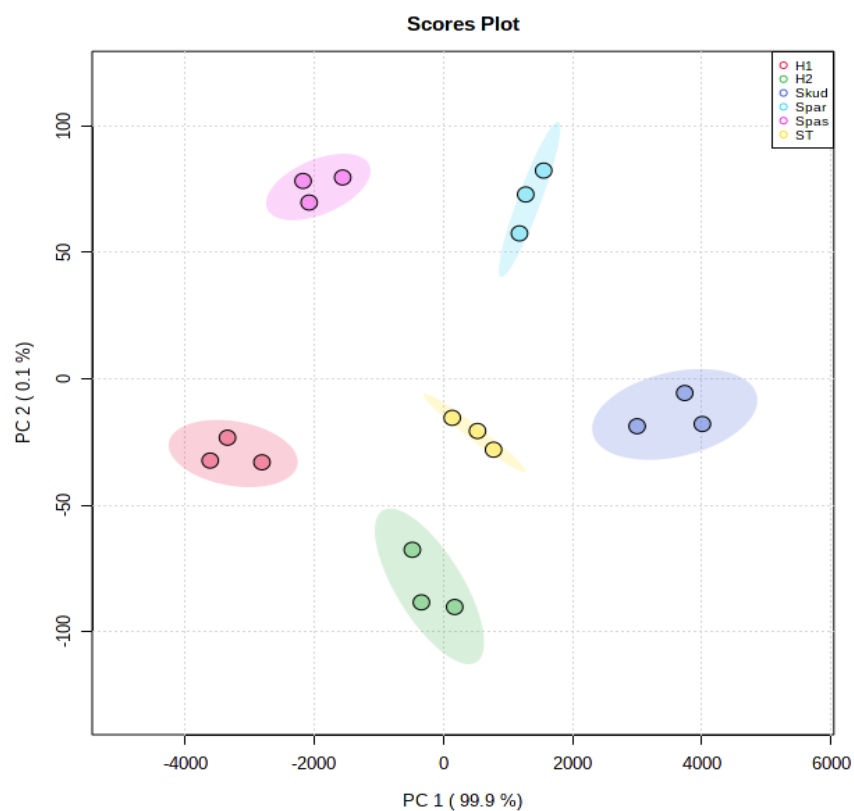

Figure S4 Principal component analysis (PCA) of the volatile components in the “Kéknyelű” wine inoculated with different yeast strains. PC1 and PC2 data derived from the principal component analysis (PCA). These components originated from the dimensional reduction of the volume of compounds by projecting each data point onto only the first two principal components to obtain lower-dimensional data, while preserving as much of the data's variation as possible. The PC1 can equivalently be defined as a direction that maximizes the variance of the projected data.
